# Supplementary material for: TFG-maintaining stability of overlooked FANCD2 confers early DNA-damage response
Source: Aging (Albany NY). 2020 Oct 24;12(20):20268–84. doi: 10.18632/aging.103782 (PMC7655164; doi:10.18632/aging.103782)
Supplement: Supplementary Figures [file aging-12-103782-s001..pdf]

[www.aging-us.com](http://www.aging-us.com)

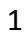

## AGING

**A**

Band A:~ 50-55kDa

| Unique | Total reference | Gene Symbol | predicted kDa  |                        |
|--------|-----------------|-------------|----------------|------------------------|
| 14     | 21 TFG_HUMAN    | TFG         | 50 kDa Protein | TRK-Fused Gene Protein |
| 12     | HUMAN           |             | 57 kDa Protein |                        |
| 11     | HUMAN           |             | 60 kDa Protein |                        |
| 10     | HUMAN           |             | 53 kDa Protein |                        |

**B**

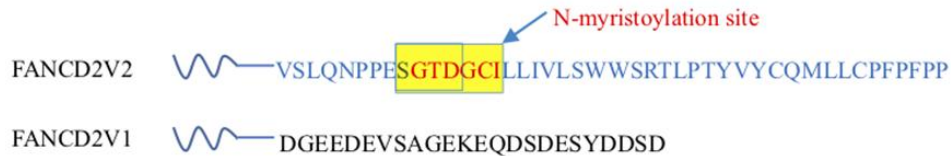

**C**

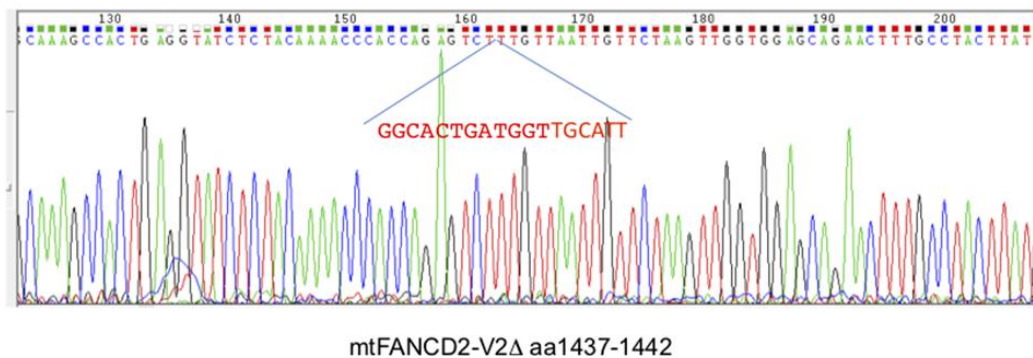

**D**

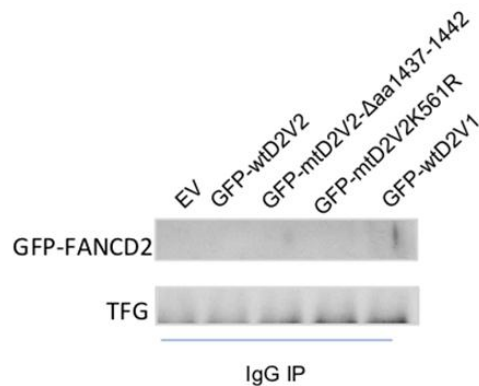

**Supplementary Figure 2. TFG was found to be associated with wtFANCD2-V2, but not wtFANCD2-V1 or mtFANCD2-V2 Δ aa1437-1442.** (A) After immunoprecipitation with anti-FANCD2-V2 or FANCD2-V1 antibodies, the specific protein bands that pull-down by anti-FANCD2-V2 antibodies were sent for mass spectrometric analysis. TFG protein was found to be one of putative partners. (B) Illustration of the putative functional motif at the carboxyl terminal of FANCD2-V2. (C) mtFANCD2-V2Δ aa 1437-1442 was verified by sequencing. The deletion part was indicated in red characters. (D) Negative control for IP performed in Fig 2D. The same amount of IgG was used to perform the corresponding IP shown in the Fig 2D. Both GFP fused FANCD2 and endogenous TFG were not detectable the pulldown derived with non-specific rabbit IgG. The IP and WB were performed at the same time when IPs shown in Fig 2D with the same batch of cell lysates.

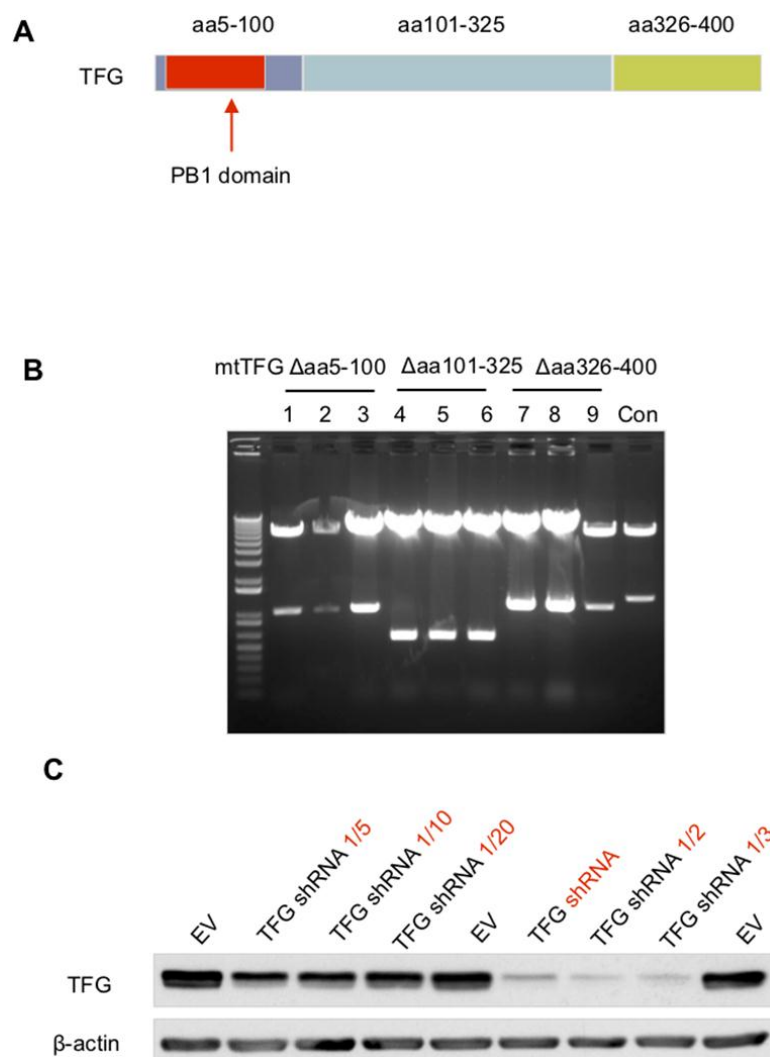

**Supplementary Figure 3. Establishment of domain deleted TFG.** (A) Schematic graph showed three parts of deleted domain of TFG. There is a PB1 domain within the aa5-100 highlighted with red color. (B) Domain deleted TFG plasmid were confirmed by restriction enzyme digestion, and sizes were compared to the wild type TFG control plasmid. (C) TFG-silenced cells were verified by western blotting. The compromised TFG expressing cells were pooled for the experimental use. The U2OS cells were infected with different concentrations of lenti-virus expressing TFG-shRNA targeting the 3'UTR of *TFG* gene. Then cells were selected by puromycin and analyzed by western blotting.

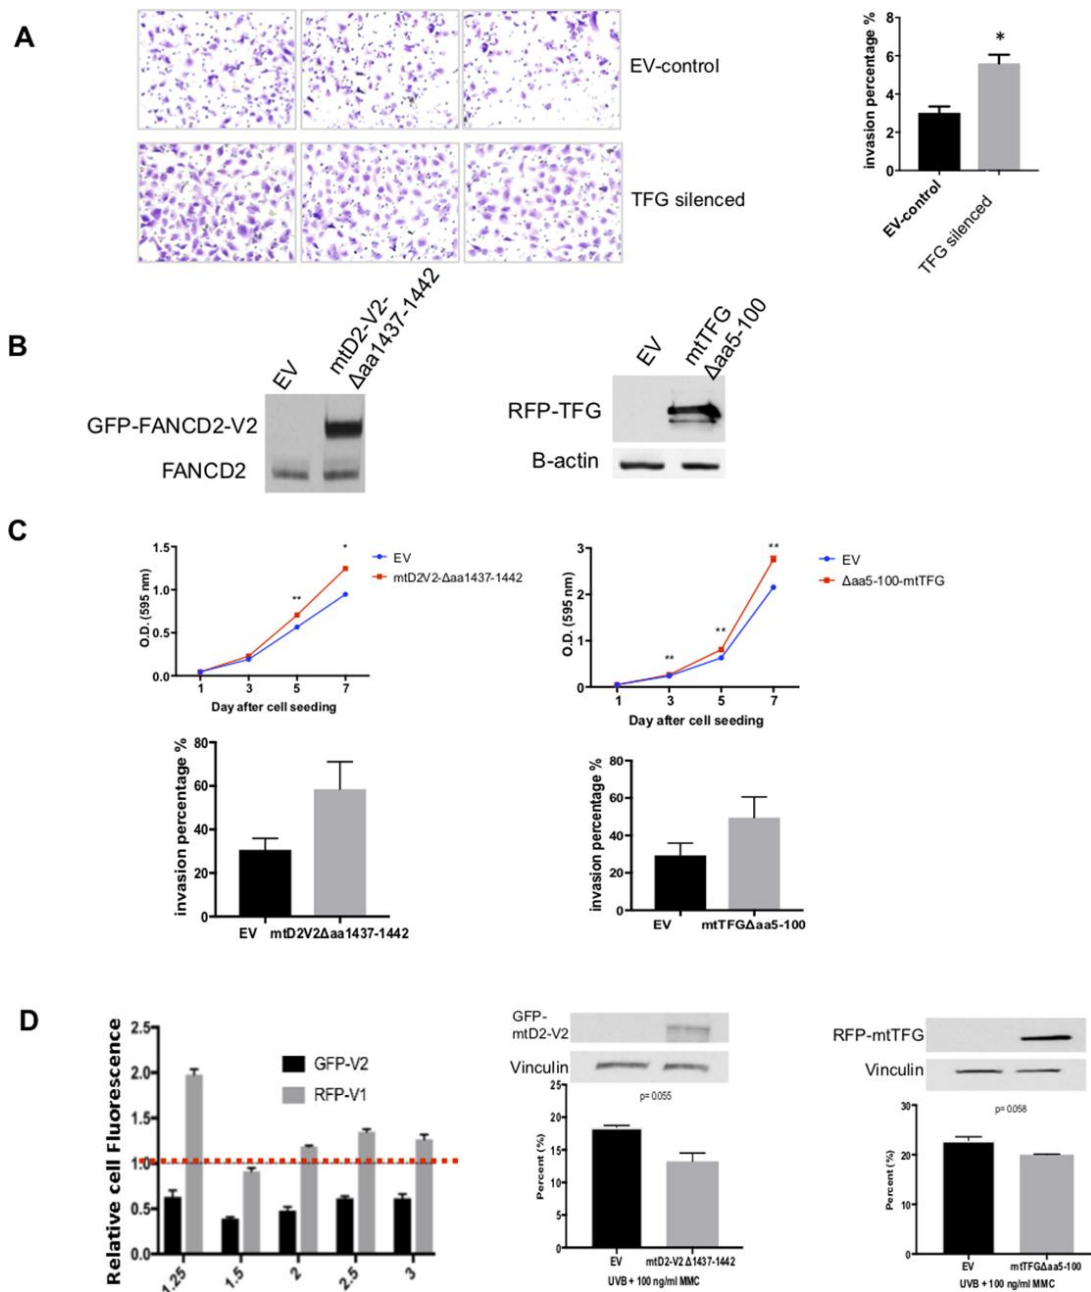

**Supplementary Figure 4. Further characterization of the interaction between TFG and FANCD2-V2.** (A) Compromised TFG expression elevates cell oncogenicity. Trans-well assay was performed using cells expressing different levels of TFG to test their capacity of migration. TFG-silenced cells showed stronger capacity of migration comparing to control cells. (B) Verification of cells stably expressing mtTFG $\Delta$ aa5-100 TFG or mtFANCD2-V2 $\Delta$ aa1437-1442. Western blotting analysis was performed on pool-selected cells that overexpressing mtTFG $\Delta$ aa5-100 TFG (right) or mtFANCD2-V2 $\Delta$ aa1437-1442 (left). (C) Statistical analysis of images shown in Fig. 4E for the oncogenicity of U2OS derivative cells. Cells carrying mtTFG $\Delta$ aa5-100 TFG or mtFANCD2-V2 $\Delta$ aa1437-1442 gained oncogenic potential compared to the corresponding control cells transfected with empty vector. (D) Left: The Red or Green fluorescence measurement in TFG-silenced or normal expressed cells. Green fluorescence was dramatically reduced in TFF-silenced cells compared to the corresponding control cells (ratio<1). Red fluorescence was not reduced, but elevated to some degree. Therefore, TFG-silencing can reduce FANCD2-V2, but not FANCD2-V1, in the nucleus. (S4D). Right: The interrupted interaction between FANCD2-V2 and TFG confers cell sensitivity. U2OS derivative cells expressing empty vector for control, mtFANCD2-V2, or mtTFG were treated by 25J/m2 UVB and followed by 100ng MMC. Three days later these cells were collected for the comparison of growing cell numbers. The number of cells expressing mtFANCD2-V2 or mtTFG were consistently reduced compared to the corresponding control cells.
